# Supplementary material for: Connexin 26 and Connexin 43 in Canine Mammary Carcinoma
Source: MDPI journal article supplement (doi:10.3390/vetsci6040101), 2019-12-09
Supplement: s1 [file s1]

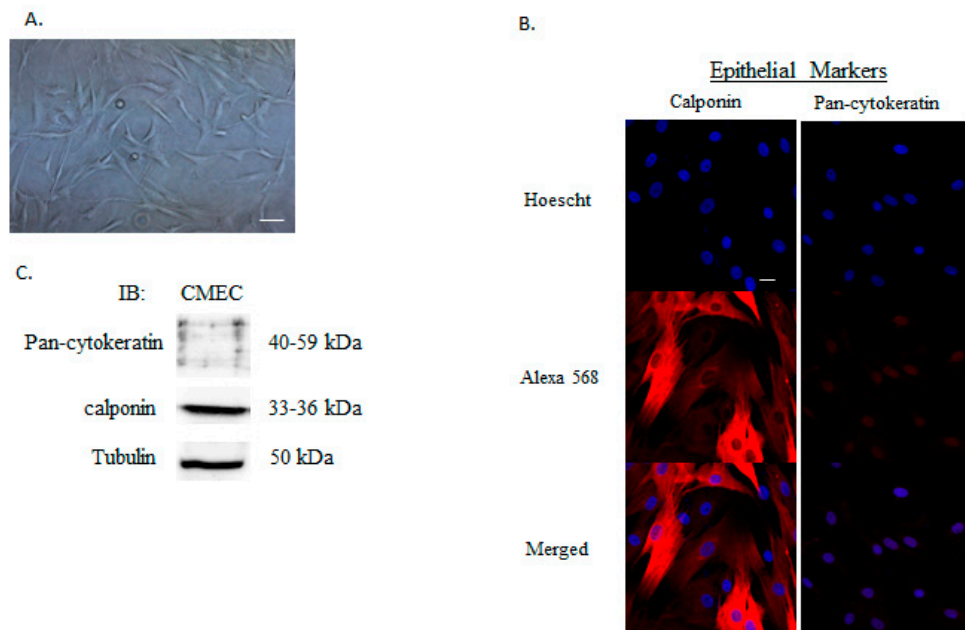

**Figure S1.** Characterization of Canine Mammary Epithelial Cells. Micrograph of CMEC in cell culture at 20X (A). Cells were screened for epithelial markers using immunocytochemistry (B) and Western blot (C). The bar is equivalent to 20  $\mu$ m.
